# Supplementary material
Source: publisher figshare collection journal article supplement (https://frontiersin.figshare.com/ndownloader/files/31653518)
Supplement: Supplementary file 1 [file 31653518]

**Supplementary table 3: Socio-demographic factors stratified by cassava infection**

| **Variables** | **Total,**  **n (%)** | **CBSVs Positive,**  **n (%)** | **Chi square value** | **df** | **p value*** |
| --- | --- | --- | --- | --- | --- |
| **Category of respondents** | |  |  |  |  |
| Individual Farmers | 76 (58.5) | 32 (69.6) | 5.168 | 1 | **0.023** |
| Cooperative | 54 (41.5) | 14 (30.4) |  |  |  |
| **Province** |  |  |  |  |  |
| South | 50 (38.5) | 20 (43.4) | 2.579 | 3 | 0.461 |
| East | 60 (46.2) | 22 (48.0) |  |  |  |
| West | 10 (7.7) | 2 (4.3) |  |  |  |
| North | 10 (7.7) | 2 (4.3) |  |  |  |
| **Farmers' age in years** | |  |  |  |  |
| 25-35 | 42 (32.3) | 15 (32.6) | 3.946 | 2 | **0.043** |
| 35-45 | 41 (31.5) | 10 (21.7) |  |  |  |
| 45 and above | 47 (36.2) | 21 (45.7) |  |  |  |
| **Gender** |  |  |  |  |  |
| Male | 84 (64.6) | 29 (63.0) | 0.077 | 1 | 0.781 |
| Female | 46 (35.4) | 17 (37.0) |  |  |  |
| **Marital status** | |  |  |  |  |
| Married | 87 (66.9) | 32 (69.6) | 0.534 | 2 | 0.766 |
| Single | 25 (19.2) | 9 (19.6) |  |  |  |
| Widow/er | 17 (13.5) | 5 (10.9) |  |  |  |
| **Education level** | |  |  |  |  |
| Illiterate | 23 (17.7) | 8 (17.4) | 1.006 | 2 | 0.605 |
| Primary | 94 (72.3) | 35 (76.1) |  |  |  |
| Secondary | 13 (10.0) | 3 (6.5) |  |  |  |
| * Significant at p<0.05 bolded; df: degree of freedom | | | | | |
